# Supplementary material
Source: PubMed Central journal article supplement (PMC4116057)
Supplement: ASN.2013060675_ASN2013060675SupplementaryData.pdf [file ASN.2013060675_ASN2013060675SupplementaryData.pdf]

## SUPPLEMENTARY FIGURE LEGENDS

**Supplementary Figure 1** Dose-dependent effects of CSF-1 treatment in *op/op* mice.

Seven groups were administered glyoxylate by daily intra-abdominal injection for 6 days. To investigate the role of CSF-1 in kidney crystal formation, mice of each genotype were injected subcutaneously with purified recombinant human CSF-1 (rhCSF-1), with concomitant glyoxylate administration, daily for 6 days.

Data are presented as mean  $\pm$  SE. \* $p < 0.05$  compared with untreated day 6 *op/op* mice. *op* + CSF-1(0.1), (1.0), (5.0), and (10) indicate *op/op* mice administered 0.1, 1.0, 5.0, and 10  $\mu$ g of CSF-1 per mouse, respectively.

A. The ratio of area with renal crystal deposition. The ratio of renal crystal depositions in *op*+CSF-1 (1.0), (5.0), and (10) groups were significantly lower than in the *op/op* group.

B. The concentrations of serum CSF-1. CSF-1 levels were calculated using multiple quantitative immunoassays with an analysis device (MAGPIX; Merck Millipore, Billerica, MA). The serum CSF-1 concentrations of *op/op* mice were significantly lower than those of the +/+ group, but those in the *op*+CSF-1 (5.0) and (10) groups were increased significantly compared with *op/op*.

Based on these results, we used a CSF-1 concentration of 5.0  $\mu\text{g}$  per mouse for subsequent experiments.

### Supplementary Figure 1

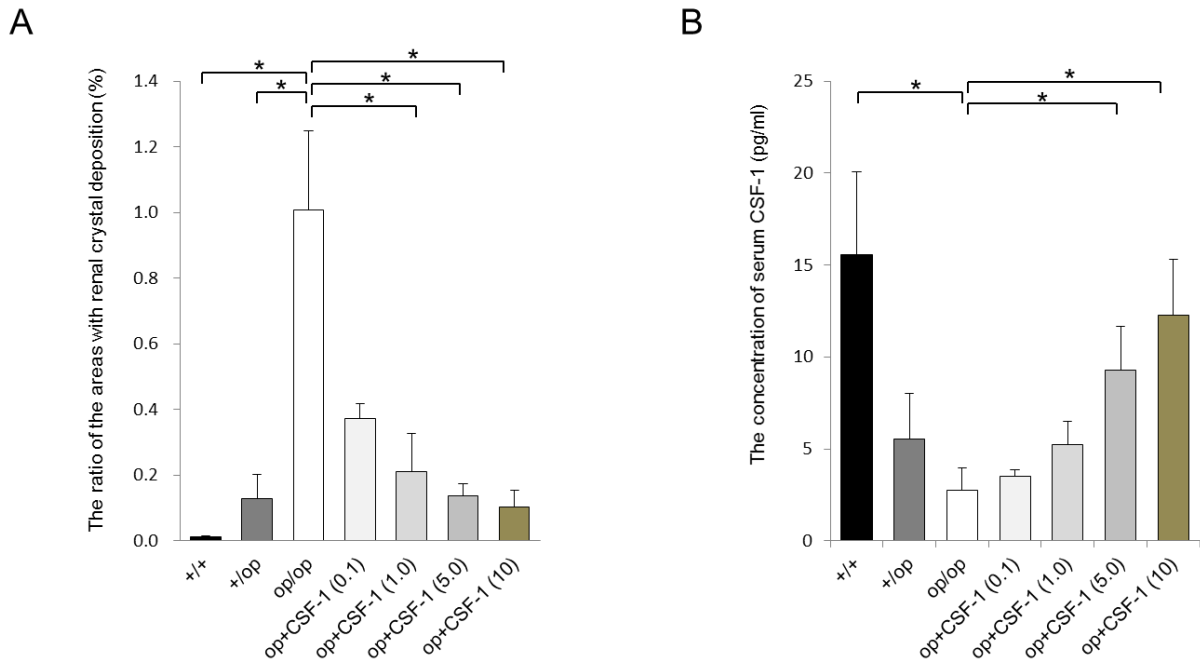

### Supplementary Table 1.

Body weight, water intake, and urinary concentrations of +/+ and *op/op* mice

|              | Day 0           |                  | Day 6                         |                               |
|--------------|-----------------|------------------|-------------------------------|-------------------------------|
|              | +/+             | <i>op/op</i>     | +/+                           | <i>op/op</i>                  |
| BW (g)       | 23.8 $\pm$ 0.6  | 20.8 $\pm$ 1.1   | 22.4 $\pm$ 1.0                | 20.8 $\pm$ 0.9                |
| WI (mL)      | 3.0 $\pm$ 0.3   | 3.2 $\pm$ 0.4    | 5.4 $\pm$ 0.8 <sup>§</sup>    | 4.6 $\pm$ 0.4 <sup>§</sup>    |
| UV (mL)      | 1.14 $\pm$ 0.10 | 0.62 $\pm$ 0.10* | 1.84 $\pm$ 0.76               | 1.48 $\pm$ 0.29 <sup>§</sup>  |
| U-Ca (mg/dL) | 3.0 $\pm$ 0.3   | 3.7 $\pm$ 0.6    | 3.1 $\pm$ 0.7                 | 4.1 $\pm$ 1.2                 |
| U-Ox (mg/L)  | 173.8 $\pm$ 8.0 | 192.0 $\pm$ 7.9  | 288.0 $\pm$ 28.4 <sup>§</sup> | 291.3 $\pm$ 44.5 <sup>§</sup> |

On day 0, the urinary volume (UV) of the *op/op* mice was lower than that of the *+/+* group; otherwise there were no significant differences in body weight (BW), water intake (WI), urinary calcium (U-Ca), and urinary oxalate (U-Ox) between groups. The WI of both *+/+* and *op/op* mice increased on day 6 compared with day 0, whereas the UV of *op/op* mice was higher on day 6 than on day 0. The concentrations of U-Ox on day 6 were higher than on day 0 in both groups.

Data are presented as mean  $\pm$  SE. \* $p < 0.05$  compared with *+/+* mice,  $^{\S}p < 0.05$  compared with day 0 in each group.

BW, body weight; WI, water intake; UV, urinary volume; U-Ca, urinary calcium; U-Ox, urinary oxalate.

### **Supplementary Table 2.**

A list of genes showing a different expression pattern between M1 and M2 macrophages. M1 and M2 macrophages were prepared from the bone marrow cells of wild-type mice, then subjected to microarray analysis using Agilent SurePrint G3 Mouse GE microarrays. The analysis was performed using triplicates of each macrophage subpopulation. Probes showing significant ( $p < 0.01$ , and  $> 4$ -fold) differences between M1 and M2 macrophages are listed. The

probe ID of the Agilent array, official gene symbol, and average values of the fold-difference are shown.

**Supplementary Table2.**

A list of genes showing a different expression pattern between M1 and M2 macrophages

| Probe ID      | Official Gene Symbol | M1/M2(fold)  |
|---------------|----------------------|--------------|
| A 51_P257951  | Retnla               | -2291.429843 |
| A 55_P2079009 | Slco2b1              | -193.0182164 |
| A 55_P2030155 | Slco2b1              | -89.64720135 |
| A 55_P1988108 | Mrc1                 | -85.60838472 |
| A 55_P2119772 | Scn3a                | -85.56570377 |
| A 52_P425839  | Retnlg               | -68.87519533 |
| A 52_P547662  | P2ry1                | -51.6391769  |
| A 66_P106808  | Scn3a                | -45.2257054  |
| A 51_P455338  | Ear11                | -37.52441304 |
| A 52_P71686   | Atp6v0d2             | -35.66962145 |
| A 55_P2002291 | Msx3                 | -29.46520156 |
| A 52_P590396  | Sort1                | -29.43434503 |
| A 52_P126403  | Tmem26               | -27.87923946 |
| A 52_P16419   | Gpd1                 | -26.85207645 |
| A 55_P2085974 | Igf1                 | -26.55213197 |
| A 52_P161630  | St6gal1              | -21.71107416 |
| A 51_P167876  | Tfrc                 | -21.47003444 |
| A 55_P2097998 | 1500017E21Rik        | -20.19696038 |
| A 55_P2026139 | BC055004             | -18.2303912  |
| A 65_P06446   | Tfrc                 | -18.19677273 |
| A 55_P2406802 | 4930511J24Rik        | -17.88859903 |
| A 51_P303424  | Itgax                | -17.84860851 |
| A 51_P303160  | Arg1                 | -17.61197309 |
| A 55_P2128853 | Ear12                | -17.34376369 |
| A 55_P2082796 | Gm14461              | -17.07099033 |
| A 51_P433083  | 4930510E17Rik        | -16.73492291 |
| A 55_P2036394 | Slc39a12             | -16.14410995 |
| A 66_P124179  | Atp6v0d2             | -16.13305554 |
| A 51_P366672  | Slc36a2              | -15.80344541 |
| A 55_P2031636 | Igf1                 | -15.62547238 |
| A 65_P13459   | Cd300lb              | -15.49681791 |
| A 52_P228236  | Tfrc                 | -15.33087038 |
| A 51_P229498  | Lrfrn2               | -14.21049791 |
| A 55_P2220683 | 4833419A21Rik        | -14.18143481 |
| A 55_P1952618 | Ear2                 | -14.02326226 |
| A 51_P517145  | Sort1                | -13.23131182 |
| A 51_P106799  | Pparg                | -12.65224669 |
| A 55_P2252891 | D11Ertd717e          | -12.4725591  |
| A 51_P398723  | Flt1                 | -12.4709497  |
| A 51_P324287  | Kif23                | -12.2346642  |
| A 55_P2105783 | Mmp12                | -12.00312455 |
| A 55_P2097478 | Gda                  | -11.82350524 |
| A 55_P2114863 | Mgl1                 | -11.79527378 |
| A 55_P2045129 | 5830410O09Rik        | -11.7622414  |
| A 55_P2344244 | 4930556H04Rik        | -11.66942039 |
| A 55_P2067041 | Agxt2                | -11.39357269 |
| A 55_P1984596 | Stxbp5               | -11.33321282 |
| A 51_P520936  | Bcar3                | -11.26745357 |
| A 52_P412585  | Ear1                 | -11.01401711 |
| A 55_P2120469 | Armc2                | -10.98069451 |
| A 55_P2025523 | Arhgap6              | -10.93242041 |
| A 51_P279100  | Ptgs1                | -10.90917396 |
| A 55_P2036176 | Mcf2l                | -10.4517598  |
| A 55_P2057430 | Lipn                 | -10.31938787 |

|               |               |              |
|---------------|---------------|--------------|
| A_66_P121459  | Cenpa         | -10.20463333 |
| A_55_P2163774 | Crip1         | -10.04088341 |
| A_52_P257812  | Lpl           | -9.972980297 |
| A_55_P2084739 | Gent1         | -9.832105526 |
| A_55_P1988623 | Add3          | -9.744211179 |
| A_52_P21550   | Gent1         | -9.727608049 |
| A_51_P103397  | Vwf           | -9.655974057 |
| A_52_P375323  | Slc9a9        | -9.594972024 |
| A_52_P116006  | Gda           | -9.406386223 |
| A_52_P585124  | Cxcr4         | -9.347969714 |
| A_55_P2114187 | Gm6522        | -9.333124884 |
| A_66_P133397  | Chi3l4        | -9.27371699  |
| A_66_P138915  | Fyn           | -9.217805523 |
| A_55_P1974028 | Stab2         | -9.166438104 |
| A_51_P513716  | Ankrd55       | -9.112114654 |
| A_51_P469285  | Nrp1          | -9.078790432 |
| A_66_P115682  | Tectb         | -9.057170397 |
| A_55_P2256601 | AU022434      | -8.81816456  |
| A_55_P2109445 | Irf4          | -8.74831883  |
| A_55_P2036180 | Mcf2l         | -8.699922022 |
| A_55_P2063316 | Mgl1          | -8.659932621 |
| A_51_P459661  | Lipa          | -8.626074643 |
| A_51_P409452  | Cldn11        | -8.584080467 |
| A_52_P139716  | Olfrl12       | -8.51571419  |
| A_52_P553890  | Itgb3         | -8.473368312 |
| A_55_P2014882 | Dhrs9         | -8.42979969  |
| A_51_P302139  | Mastl         | -8.278280882 |
| A_52_P308413  | 1810011H11Rik | -8.274175739 |
| A_52_P628067  | Cdca3         | -8.240277943 |
| A_55_P2157008 | Ear10         | -8.232400101 |
| A_51_P322640  | Ccl24         | -8.104442798 |
| A_55_P2062418 | Atp6v0a1      | -8.053147736 |
| A_55_P2025528 | Arhgap6       | -8.001363287 |
| A_55_P1981135 | Olfrl14       | -7.97770126  |
| A_51_P347240  | Lrr1          | -7.974071824 |
| A_51_P122582  | Daglb         | -7.82054023  |
| A_51_P167292  | Chi3l3        | -7.793409911 |
| A_52_P577662  | Ednrb         | -7.769729728 |
| A_51_P259296  | Lpl           | -7.732994034 |
| A_52_P404942  | ORF63         | -7.722895232 |
| A_51_P195825  | Tsnaxip1      | -7.720016869 |
| A_66_P117729  | Awat1         | -7.694009441 |
| A_55_P2036392 | Slc39a12      | -7.659897569 |
| A_51_P460048  | Cnrip1        | -7.568499995 |
| A_55_P1952240 | Slitrk2       | -7.543305733 |
| A_55_P2082679 | Aph1b         | -7.519703615 |
| A_55_P2086575 | Arhgap19      | -7.448640325 |
| A_55_P2113051 | Fosb          | -7.314751737 |
| A_55_P2084723 | LOC635918     | -7.205361931 |
| A_55_P2288285 | 2310007J06Rik | -7.125249831 |
| A_51_P114634  | Amz1          | -7.10351966  |
| A_55_P2116385 | Gpr183        | -7.095143189 |
| A_52_P591473  | Armc2         | -7.088917794 |
| A_51_P391367  | Tcfap4        | -7.086270561 |
| A_55_P2043862 | Stmn1         | -6.978005332 |
| A_52_P171019  | Man1a         | -6.927564797 |
| A_55_P2409088 | BB163080      | -6.904117128 |
| A_55_P2085979 | Igf1          | -6.899735703 |
| A_52_P366047  | Rpp40         | -6.886686484 |

|               |               |              |
|---------------|---------------|--------------|
| A 51_P220317  | Cdca7l        | -6.868540869 |
| A 55_P2140118 | Qpct          | -6.824434483 |
| A 55_P2005320 | Tm7sf4        | -6.815976399 |
| A 52_P571371  | Tmem144       | -6.796466121 |
| A 55_P2065726 | Snx29         | -6.791396673 |
| A 55_P1970895 | Olfcr889      | -6.779481786 |
| A 52_P299832  | Plxnc1        | -6.759539852 |
| A 52_P552589  | Map4k1        | -6.755473999 |
| A 55_P2112560 | Ern1          | -6.747341584 |
| A 55_P2068560 | Lyzl4         | -6.706685544 |
| A 55_P2046648 | LOC641221     | -6.689131467 |
| A 55_P2033362 | Egr2          | -6.640668401 |
| A 55_P1961736 | Rcan2         | -6.61322506  |
| A 55_P2065294 | Scn3a         | -6.602621753 |
| A 52_P222696  | Poteg         | -6.59955432  |
| A 55_P2011436 | Gm11223       | -6.587492892 |
| A 55_P2065288 | Scn3a         | -6.533916418 |
| A 55_P2178084 | Dnmt3a        | -6.518953389 |
| A 55_P1994927 | Rab3il1       | -6.447121624 |
| A 55_P2088028 | Mtss1         | -6.443791885 |
| A 55_P1960735 | Gdf15         | -6.438122377 |
| A 55_P2221901 | Gm10797       | -6.400520802 |
| A 55_P2086664 | Tspan33       | -6.388357943 |
| A 51_P251352  | Slc25a13      | -6.324277358 |
| A 51_P397925  | Smap2         | -6.323373776 |
| A 55_P2068663 | Stmn1         | -6.317014133 |
| A 52_P381430  | Tbc1d4        | -6.314804367 |
| A 52_P33831   | Lrrc27        | -6.299386584 |
| A 52_P251366  | Neil3         | -6.294772769 |
| A 55_P2119907 | Dnahc11       | -6.136536291 |
| A 55_P2065671 | Ccnb1         | -6.104058971 |
| A 51_P349495  | Mboat1        | -6.078918598 |
| A 55_P2345853 | 3830612M24    | -6.078824931 |
| A 51_P302520  | Myom1         | -6.011078664 |
| A 66_P133404  | 2810417H13Rik | -5.948624035 |
| A 51_P445841  | Deptor        | -5.945832411 |
| A 51_P415905  | Pola1         | -5.871368882 |
| A 51_P351896  | Fam198b       | -5.836336679 |
| A 55_P2005946 | Lyzl4         | -5.831030666 |
| A 55_P1979491 | Cd28          | -5.827714777 |
| A 51_P501018  | Nek2          | -5.821897945 |
| A 55_P2003541 | Nrcam         | -5.798575653 |
| A 55_P2037662 | Atp1a3        | -5.773417354 |
| A 52_P442169  | Bsn           | -5.771540722 |
| A 52_P15388   | Ltf           | -5.770900793 |
| A 52_P11174   | Hip1          | -5.756245327 |
| A 55_P2155859 | Olfcr243      | -5.749093523 |
| A 55_P2176280 | Prkar1b       | -5.745078477 |
| A 52_P385606  | Ckb           | -5.74483971  |
| A 52_P507498  | Plxnc1        | -5.730491885 |
| A 51_P236412  | Cdkl2         | -5.726022344 |
| A 55_P2101757 | Dscc1         | -5.72401241  |
| A 55_P2024953 | Tbc1d4        | -5.695964284 |
| A 55_P2109857 | Rgs2          | -5.659829135 |
| A 66_P136186  | Wee1          | -5.649084183 |
| A 52_P708792  | Gm5547        | -5.630467442 |
| A 55_P2060193 | Mcf2l         | -5.627508263 |
| A 55_P1976224 | Ckb           | -5.528309551 |
| A 55_P2122020 | Klf4          | -5.51108787  |

|               |               |              |
|---------------|---------------|--------------|
| A 52_P142191  | Aph1b         | -5.504476639 |
| A 55_P1963184 | LOC100504348  | -5.495648109 |
| A 55_P2336558 | Chn2          | -5.495575237 |
| A 55_P2025033 | Cep55         | -5.476542631 |
| A 55_P2056496 | Tk1           | -5.454398848 |
| A 51_P247249  | Alox5         | -5.451472615 |
| A 51_P368009  | E2f2          | -5.443142704 |
| A 66_P104980  | Tceal5        | -5.440263763 |
| A 55_P2092661 | Nup210        | -5.436535994 |
| A 66_P134542  | Anln          | -5.415171916 |
| A 55_P2013268 | Gm13391       | -5.390185861 |
| A 51_P485862  | Eef1a2        | -5.384735571 |
| A 51_P272283  | Cmbl          | -5.357973924 |
| A 52_P231075  | Fcrls         | -5.338307608 |
| A 55_P2001891 | Prps1         | -5.313940374 |
| A 55_P1977008 | Gfi1          | -5.308712454 |
| A 55_P2033557 | AB041803      | -5.226018023 |
| A 52_P354373  | 1190002F15Rik | -5.222816078 |
| A 52_P325527  | Edil3         | -5.204042341 |
| A 55_P2089710 | Ednrb         | -5.169462204 |
| A 55_P2030030 | Adssl1        | -5.137601103 |
| A 51_P481920  | Ccna2         | -5.096663837 |
| A 55_P2170681 | Cdca8         | -5.057357623 |
| A 51_P172054  | Gas6          | -5.055812638 |
| A 51_P125205  | Aqp1          | -5.052998158 |
| A 55_P1983450 | S100a4        | -5.038056844 |
| A 51_P389988  | Slc40a1       | -5.033425461 |
| A 51_P166023  | Hip1          | -5.012601587 |
| A 55_P2030583 | Lrriq1        | -5.008032761 |
| A 55_P2177578 | Atp6v0a1      | -4.998318032 |
| A 55_P2008417 | Mnd1          | -4.972271866 |
| A 55_P2098539 | Itgb3bp       | -4.970865611 |
| A 52_P239320  | Syng1         | -4.967491848 |
| A 55_P2045055 | Clec10a       | -4.965589499 |
| A 51_P410949  | Polr3g        | -4.941749563 |
| A 55_P1972772 | Gsg1          | -4.894188948 |
| A 55_P2129514 | Trerf1        | -4.89405953  |
| A 55_P1983768 | Birc5         | -4.881025538 |
| A 55_P2016652 | Cdk1          | -4.877592558 |
| A 55_P1983448 | S100a4        | -4.832943068 |
| A 65_P14951   | Cblb          | -4.828199034 |
| A 51_P191649  | Ndc80         | -4.824403248 |
| A 55_P2164534 | Dtl           | -4.803811696 |
| A 55_P1983769 | Birc5         | -4.78884586  |
| A 55_P1952256 | Ccnb1         | -4.770373323 |
| A 55_P1953723 | Rab13         | -4.760924004 |
| A 51_P155152  | Ank           | -4.757171247 |
| A 51_P481398  | Kif11         | -4.726222665 |
| A 51_P246653  | Clec7a        | -4.720529843 |
| A 51_P240453  | Nusap1        | -4.708246648 |
| A 52_P523503  | Tmem154       | -4.691094293 |
| A 55_P1983773 | Birc5         | -4.684343267 |
| A 52_P168567  | Cebpa         | -4.674365674 |
| A 51_P132978  | Idh1          | -4.64597007  |
| A 55_P1996941 | Ube2c         | -4.63652849  |
| A 51_P320852  | Cd9           | -4.625390914 |
| A 51_P155142  | Cdca8         | -4.6158387   |
| A 51_P281380  | Tspan5        | -4.613240012 |
| A 66_P105422  | Lonrf3        | -4.590843812 |



|               |               |              |
|---------------|---------------|--------------|
| A_52_P193925  | Sulf2         | -4.575744826 |
| A_51_P461319  | Gatm          | -4.553098909 |
| A_51_P303749  | Depdc1b       | -4.524111857 |
| A_66_P120074  | Uhrf1         | -4.502704404 |
| A_52_P134195  | Ceacam10      | -4.480646159 |
| A_55_P1976127 | Ect2          | -4.479036708 |
| A_51_P204402  | Shcbp1        | -4.451632508 |
| A_51_P408071  | Kntc1         | -4.435473424 |
| A_55_P1973783 | Tex9          | -4.39818738  |
| A_55_P2149931 | Arap2         | -4.393634016 |
| A_55_P2008651 | Qdpr          | -4.376746421 |
| A_51_P472829  | Aif1l         | -4.37395052  |
| A_52_P540219  | Timp2         | -4.368717748 |
| A_55_P2076048 | Nuf2          | -4.346081925 |
| A_55_P2074736 | Prkar1b       | -4.334362149 |
| A_66_P102528  | Tspan5        | -4.329959107 |
| A_55_P1991475 | Sesn1         | -4.323844171 |
| A_51_P220150  | Angptl7       | -4.318999352 |
| A_55_P2176240 | Pdxk          | -4.313165576 |
| A_55_P2130388 | Mical1        | -4.300263577 |
| A_55_P1968178 | Smagp         | -4.287784562 |
| A_55_P2180301 | Clcn5         | -4.287540176 |
| A_51_P101006  | Ak8           | -4.267666766 |
| A_51_P309589  | 2700099C18Rik | -4.26562835  |
| A_55_P1998601 | Slc17a9       | -4.254681507 |
| A_55_P2152427 | Zwilch        | -4.248997015 |
| A_55_P2118684 | Idh2          | -4.238806472 |
| A_51_P473888  | Il6st         | -4.225158902 |
| A_51_P123405  | Bub1          | -4.218512861 |
| A_55_P2109717 | Kif20b        | -4.218341808 |
| A_55_P1987043 | Tpp1          | -4.215660684 |
| A_55_P2156304 | Kcnj16        | -4.209759454 |
| A_55_P2069659 | 9930013L23Rik | -4.200165862 |
| A_55_P2007878 | Rnf144b       | -4.19074942  |
| A_52_P227391  | Kif15         | -4.18288316  |
| A_52_P104824  | Diap3         | -4.179882536 |
| A_52_P588881  | Iqgap3        | -4.177494416 |
| A_55_P2063626 | Matk          | -4.170169603 |
| A_51_P148105  | Rad51         | -4.169961345 |
| A_52_P136138  | Fdft1         | -4.164321835 |
| A_55_P2158011 | D2Ertd750e    | -4.15787331  |
| A_55_P2031631 | Igf1          | -4.149596046 |
| A_52_P231170  | Megf9         | -4.142621181 |
| A_55_P2165120 | Cblb          | -4.138949368 |
| A_51_P415220  | Zmat3         | -4.135413065 |
| A_51_P513530  | Spag5         | -4.134959503 |
| A_55_P2150003 | Gnat3         | -4.131155026 |
| A_51_P241843  | Tmem202       | -4.111539531 |
| A_51_P375146  | Cd36          | -4.099095778 |
| A_55_P2058348 | Tmem206       | -4.096541414 |
| A_55_P2292046 | D230018H15Rik | -4.088002277 |
| A_55_P2085984 | Igf1          | -4.085554508 |
| A_66_P138584  | Mnd1          | -4.084029819 |
| A_55_P2062255 | 4831426I19Rik | -4.073067434 |
| A_55_P2294295 | Tanc2         | -4.072608402 |
| A_55_P2080774 | Qdpr          | -4.053935177 |
| A_51_P133137  | Kif20a        | -4.053879764 |
| A_52_P529570  | Nsl1          | -4.053225588 |
| A_51_P248387  | Pcyox1l       | -4.047112632 |

|               |               |              |
|---------------|---------------|--------------|
| A 51_P140368  | 2310061C15Rik | -4.036750582 |
| A 51_P422625  | Arl11         | -4.036439589 |
| A 55_P2115851 | 9930013L23Rik | -4.012378038 |
| A 51_P490509  | Bub1b         | -4.003832166 |
| A 55_P1969341 | Brip1         | -4.001781674 |
| A 55_P1995092 | H2-Q10        | 4.014280975  |
| A 55_P1971010 | Gzme          | 4.016123794  |
| A 55_P2133248 | Gm8995        | 4.02784152   |
| A 51_P383032  | Clec4d        | 4.043728117  |
| A 55_P1968568 | Rapgef5       | 4.0495221    |
| A 55_P2123987 | Arid3b        | 4.049579755  |
| A 52_P30550   | Acp2          | 4.050530863  |
| A 55_P2032659 | Tox           | 4.050620707  |
| A 55_P1972040 | Nox4          | 4.051317632  |
| A 51_P149714  | Ms4a6d        | 4.051870316  |
| A 55_P1969002 | Tbx3          | 4.065993996  |
| A 55_P2170309 | Ppfibp2       | 4.081006674  |
| A 55_P2086933 | Gm4368        | 4.084122106  |
| A 55_P2033255 | Prdx5         | 4.08872774   |
| A 55_P1955309 | Zfp800        | 4.097444562  |
| A 51_P384318  | C1ra          | 4.09820059   |
| A 66_P109986  | Cd33          | 4.098274845  |
| A 52_P367774  | Zfp821        | 4.098550176  |
| A 52_P496924  | Mgat4a        | 4.100495204  |
| A 55_P1999339 | Inpp5b        | 4.102719951  |
| A 55_P1958250 | Rnf114        | 4.107886156  |
| A 55_P1985850 | Timp1         | 4.113290599  |
| A 51_P195958  | Phlda1        | 4.113464891  |
| A 52_P364140  | Itga5         | 4.116160392  |
| A 55_P2090880 | Stk40         | 4.134985012  |
| A 55_P2111790 | Gem           | 4.141418908  |
| A 55_P2009121 | Agri          | 4.143397405  |
| A 51_P374726  | Ptx3          | 4.144475976  |
| A 51_P413059  | Mcp7          | 4.1451675    |
| A 52_P226348  | F730043M19Rik | 4.153008141  |
| A 55_P1953353 | Triobp        | 4.161805376  |
| A 55_P2236291 | Ppap2a        | 4.185141496  |
| A 51_P137419  | Cst7          | 4.18785009   |
| A 52_P552550  | Agtrap        | 4.189884371  |
| A 55_P1957213 | 3930401B19Rik | 4.18996444   |
| A 55_P2149763 | Tapbp         | 4.193720462  |
| A 51_P302566  | Maob          | 4.195036607  |
| A 52_P532227  | S1pr1         | 4.195415013  |
| A 55_P2277171 | Gm10134       | 4.197819691  |
| A 55_P1963364 | Fam55c        | 4.199156041  |
| A 55_P1977929 | Itgam         | 4.223128659  |
| A 55_P2037235 | Sp110         | 4.227050652  |
| A 55_P2072115 | AW011738      | 4.232599314  |
| A 55_P1989738 | 4930426L09Rik | 4.232651771  |
| A 51_P464703  | Ccl8          | 4.233301522  |
| A 52_P658122  | Ets2          | 4.242290571  |
| A 55_P2092904 | Ddb2          | 4.243470359  |
| A 51_P513568  | Stx11         | 4.259611929  |
| A 51_P515605  | Col3a1        | 4.281821755  |
| A 66_P114784  | Pla2g7        | 4.284382837  |
| A 52_P90363   | Ifi2712a      | 4.289863342  |
| A 55_P1977926 | Itgam         | 4.29605094   |
| A 51_P234539  | Nfxl1         | 4.297537713  |
| A 52_P488779  | Pilrb2        | 4.306760807  |

|               |               |             |
|---------------|---------------|-------------|
| A_52_P183181  | Adar          | 4.308156324 |
| A_55_P2010038 | Tnfsf9        | 4.308615326 |
| A_51_P295192  | Nfkbia        | 4.324942643 |
| A_55_P2044953 | Lst1          | 4.328033602 |
| A_66_P138790  | Glis3         | 4.331971646 |
| A_55_P2165286 | Gmfg          | 4.334635506 |
| A_52_P308875  | LOC100504219  | 4.339068915 |
| A_51_P234113  | Nod1          | 4.342496993 |
| A_55_P1952269 | Xylt2         | 4.342987806 |
| A_66_P119376  | Kctd12        | 4.344760644 |
| A_51_P345367  | Psmb8         | 4.352250212 |
| A_52_P645410  | Apobec3       | 4.364509114 |
| A_55_P2031125 | Ube2l6        | 4.374666384 |
| A_51_P350048  | Gstt2         | 4.374667294 |
| A_55_P2038882 | Niacr1        | 4.375552933 |
| A_52_P160955  | Sox11         | 4.38040086  |
| A_55_P2119257 | Serpine1      | 4.407955013 |
| A_51_P472621  | Zfp719        | 4.42609096  |
| A_51_P369803  | Psmb9         | 4.426792038 |
| A_51_P149349  | Nfxl1         | 4.427575462 |
| A_52_P466090  | Samhd1        | 4.439654474 |
| A_55_P1993263 | Chic1         | 4.447114037 |
| A_55_P2108763 | Sp100         | 4.45031637  |
| A_52_P479269  | Sdc1          | 4.461547068 |
| A_55_P1969078 | Adar          | 4.461779136 |
| A_55_P2087265 | Ifitm1        | 4.464226418 |
| A_55_P1959938 | Pde7b         | 4.467386574 |
| A_51_P387608  | Hif1a         | 4.473858105 |
| A_55_P2087796 | Fam176b       | 4.474298165 |
| A_55_P1955637 | Trp53i11      | 4.475491102 |
| A_55_P1960989 | Nlgn2         | 4.493374786 |
| A_51_P184484  | Mmp13         | 4.49599428  |
| A_52_P274496  | Tspan18       | 4.501033181 |
| A_55_P2152566 | Sp110         | 4.511187342 |
| A_51_P121031  | MARCH1        | 4.514057826 |
| A_55_P2192819 | BB157357      | 4.514231484 |
| A_55_P2115442 | Clec2d        | 4.528169617 |
| A_55_P2014229 | Sema4a        | 4.532547377 |
| A_51_P503822  | Slitrk6       | 4.536458937 |
| A_55_P1958991 | A530032D15Rik | 4.537388213 |
| A_52_P597461  | Skil          | 4.565805807 |
| A_55_P2003883 | Gm9909        | 4.581222712 |
| A_55_P2052924 | Sepw1         | 4.581791155 |
| A_51_P320022  | Atp10a        | 4.601584432 |
| A_55_P1971009 | Gzme          | 4.60736406  |
| A_55_P2018417 | Osbpl3        | 4.608637198 |
| A_55_P2367878 | Ncrna00085    | 4.60936112  |
| A_51_P458584  | Fpr-rs3       | 4.613783156 |
| A_55_P2123502 | Jam2          | 4.629142904 |
| A_55_P1959425 | Slc16a3       | 4.630413073 |
| A_51_P363187  | Cxcl1         | 4.631588562 |
| A_52_P634090  | Jag1          | 4.640832411 |
| A_66_P109733  | 1700123I01Rik | 4.643785711 |
| A_51_P207988  | Ptger4        | 4.677138012 |
| A_52_P520408  | Serp1         | 4.67929051  |
| A_51_P417854  | Rab20         | 4.691540762 |
| A_55_P2065601 | Sytl5         | 4.69437307  |
| A_55_P2053838 | Tnfaip3       | 4.695795562 |
| A_55_P2305623 | Cmklr1        | 4.700857865 |

|               |               |             |
|---------------|---------------|-------------|
| A 55_P2064659 | Trim12a       | 4.708252359 |
| A 51_P302738  | Upp1          | 4.721744901 |
| A 52_P665675  | Abca1         | 4.75232977  |
| A 55_P2023637 | Prg4          | 4.758607952 |
| A 55_P2094524 | Gm14005       | 4.773569288 |
| A 55_P1975560 | Ifi204        | 4.781442744 |
| A 52_P363216  | Gcnt2         | 4.784773392 |
| A 55_P2135526 | Gzmc          | 4.788395774 |
| A 55_P2179413 | Lgals3bp      | 4.791357626 |
| A 55_P2185589 | Rbms3         | 4.79184818  |
| A 55_P2067505 | Slc16a3       | 4.799167777 |
| A 51_P326191  | Serpina3g     | 4.821689669 |
| A 55_P2045741 | Fyb           | 4.822736341 |
| A 55_P2004511 | Cd300lf       | 4.82351276  |
| A 55_P2020050 | Gm8120        | 4.833734389 |
| A 52_P604515  | Zfp319        | 4.839688858 |
| A 55_P2114938 | Irf9          | 4.843230817 |
| A 51_P222657  | Tspo          | 4.843510268 |
| A 55_P2048378 | Gm5595        | 4.878540821 |
| A 55_P2179599 | Gbp8          | 4.887209162 |
| A 55_P2024841 | Gstt1         | 4.90728571  |
| A 55_P2095311 | Ly6g          | 4.917761179 |
| A 55_P2014675 | Olfir800      | 4.927266485 |
| A 52_P434055  | Birc3         | 4.935760528 |
| A 55_P2006869 | Fyb           | 4.937815734 |
| A 51_P319460  | Osmr          | 4.943119486 |
| A 55_P2031436 | Ly6e          | 4.944333645 |
| A 51_P417720  | Itga11        | 4.948802108 |
| A 55_P2168736 | Relb          | 4.957596518 |
| A 55_P2088131 | Gm5595        | 4.965737158 |
| A 52_P235102  | Gm5595        | 4.965850056 |
| A 55_P1983459 | Cflar         | 4.982517941 |
| A 51_P288876  | Tmem45a       | 5.00224514  |
| A 51_P412835  | Daxx          | 5.005476451 |
| A 55_P2033420 | 2010106G01Rik | 5.006206425 |
| A 51_P419017  | Pde10a        | 5.0104907   |
| A 55_P1970329 | Gm10696       | 5.020343225 |
| A 51_P501453  | Ms4a8a        | 5.036705577 |
| A 51_P464394  | Klb           | 5.053978756 |
| A 55_P2082096 | Wdr66         | 5.078264362 |
| A 51_P230507  | Eil2          | 5.092693527 |
| A 55_P1998892 | Smox          | 5.100417128 |
| A 51_P359636  | Lgals3bp      | 5.106508476 |
| A 52_P329185  | Pde7b         | 5.12259722  |
| A 55_P2059765 | Foxf1a        | 5.129512176 |
| A 51_P196844  | Osbpl3        | 5.130248468 |
| A 51_P469968  | H2-M3         | 5.156810925 |
| A 55_P2038525 | C3            | 5.164765333 |
| A 55_P2035504 | Nt5c3         | 5.182230908 |
| A 51_P279606  | Socs1         | 5.18412297  |
| A 52_P317627  | Gm11435       | 5.209208563 |
| A 51_P381558  | Rasa4         | 5.230610707 |
| A 52_P305279  | Spata13       | 5.27366438  |
| A 55_P2118675 | Tnip1         | 5.287453608 |
| A 55_P1981999 | BC117090      | 5.299694139 |
| A 55_P2091473 | Bnip3         | 5.307460393 |
| A 55_P2118674 | Tnip1         | 5.311904649 |
| A 55_P1960237 | Slc2a6        | 5.320153973 |
| A 66_P122110  | Mitd1         | 5.323719465 |

|               |                |             |
|---------------|----------------|-------------|
| A_55_P2160094 | Plscr2         | 5.33232432  |
| A_51_P489996  | Dst            | 5.347574142 |
| A_52_P61697   | 9930111J21Rik2 | 5.348355637 |
| A_55_P1998416 | Ifi47          | 5.357108812 |
| A_52_P559919  | Eif2ak2        | 5.365489144 |
| A_51_P483454  | Kif26b         | 5.371215629 |
| A_52_P269158  | Pid1           | 5.377240208 |
| A_52_P267391  | Trim12a        | 5.407474437 |
| A_51_P182572  | Phactr1        | 5.426367285 |
| A_55_P2053032 | Xkr8           | 5.44757053  |
| A_55_P2043367 | Apol9a         | 5.454047255 |
| A_55_P1989225 | Tgtp2          | 5.458662725 |
| A_51_P153423  | Fndc1          | 5.463050654 |
| A_55_P2091472 | Bnip3          | 5.474907158 |
| A_55_P2146254 | Ifitm1         | 5.481583599 |
| A_66_P128997  | Pml            | 5.498721277 |
| A_55_P2034705 | Nmi            | 5.503945864 |
| A_55_P2142048 | LOC100504062   | 5.518397575 |
| A_51_P323180  | Gbp9           | 5.52137795  |
| A_52_P409833  | Plat           | 5.521815944 |
| A_52_P281702  | Igfbp5         | 5.551835416 |
| A_66_P138137  | Pnp            | 5.55911952  |
| A_51_P430929  | Fam20a         | 5.569426976 |
| A_55_P2151601 | Samd9l         | 5.582204316 |
| A_55_P2055612 | Zfp800         | 5.598669432 |
| A_52_P481957  | Grem1          | 5.608721313 |
| A_55_P1978576 | Dtx2           | 5.672772864 |
| A_51_P374900  | P2ry13         | 5.708781717 |
| A_52_P359965  | Cpd            | 5.714356365 |
| A_51_P318577  | Sult6b1        | 5.727937695 |
| A_55_P2006693 | Pstpip2        | 5.740519769 |
| A_55_P1955778 | Adamts4        | 5.772313832 |
| A_55_P2061739 | Tmsb4x         | 5.773921006 |
| A_55_P1984556 | Ccl12          | 5.805107969 |
| A_55_P2147081 | Tnfaip6        | 5.827287135 |
| A_55_P1971889 | F3             | 5.841705221 |
| A_51_P131888  | Capns2         | 5.850367286 |
| A_55_P2087118 | Ly6i           | 5.855762737 |
| A_55_P2049867 | Ccrl2          | 5.864192408 |
| A_55_P2011620 | Gpr141         | 5.869622823 |
| A_55_P2091461 | Casp4          | 5.897966794 |
| A_51_P385812  | Il12b          | 5.898774261 |
| A_55_P2168223 | Aicda          | 5.920366957 |
| A_55_P2104975 | Serpina3f      | 5.922525068 |
| A_66_P119034  | Pla2g7         | 5.924541056 |
| A_55_P1984168 | Casp4          | 5.94616089  |
| A_55_P2137121 | Sp140          | 5.958728051 |
| A_66_P121787  | Samd9l         | 5.968756181 |
| A_55_P2071176 | Il1f9          | 5.984239228 |
| A_51_P307559  | 6430704M03Rik  | 5.984808977 |
| A_55_P2077068 | Malt1          | 5.987351628 |
| A_55_P2097828 | Gmfg           | 5.992226262 |
| A_51_P128876  | Ifitm3         | 6.047026913 |
| A_51_P367866  | Egr1           | 6.052247977 |
| A_55_P2182452 | Tnfsf15        | 6.082785792 |
| A_55_P2156855 | Car13          | 6.084233282 |
| A_66_P134453  | I830077J02Rik  | 6.090320284 |
| A_51_P503261  | Lrrc8c         | 6.112254606 |
| A_55_P2238406 | 6330407A03Rik  | 6.180792705 |

|               |               |             |
|---------------|---------------|-------------|
| A 55_P1960238 | Slc2a6        | 6.198262693 |
| A 55_P2070079 | Lgals9        | 6.204667628 |
| A 55_P2090660 | Mrpl39        | 6.212991153 |
| A 55_P1961395 | Pdpn          | 6.225280246 |
| A 55_P1970710 | Mllt6         | 6.228751429 |
| A 55_P2116165 | Pfkfb3        | 6.230624617 |
| A 55_P2064652 | Trim12c       | 6.236724798 |
| A 55_P2101055 | Alpk1         | 6.327338854 |
| A 55_P2097259 | Zufsp         | 6.340923054 |
| A 51_P520966  | Icosl         | 6.370800674 |
| A 55_P2182736 | Limd2         | 6.404432774 |
| A 52_P582374  | Epsti1        | 6.427179835 |
| A 52_P362917  | Pfkfb3        | 6.431465966 |
| A 55_P2066578 | Ifi204        | 6.460858147 |
| A 51_P248666  | Cd274         | 6.491419538 |
| A 55_P2036693 | Cd40          | 6.495722269 |
| A 55_P1983468 | Cflar         | 6.530218659 |
| A 52_P552194  | Il13ra1       | 6.547986285 |
| A 51_P210395  | Glrx          | 6.559429758 |
| A 52_P642239  | Pik3ap1       | 6.562006851 |
| A 51_P389751  | Relb          | 6.565972011 |
| A 55_P2106175 | Gch1          | 6.5733534   |
| A 55_P2031836 | Gpr85         | 6.600836209 |
| A 51_P120830  | Mmp10         | 6.633478237 |
| A 51_P167527  | Lum           | 6.655207278 |
| A 55_P2085915 | Tnfrsf14      | 6.737286264 |
| A 55_P2077618 | Csgalnact1    | 6.740492467 |
| A 52_P78023   | Limd2         | 6.784537167 |
| A 52_P338066  | Ubd           | 6.789680088 |
| A 55_P2017769 | B020031M17Rik | 6.790325345 |
| A 51_P154842  | Oas1f         | 6.800134586 |
| A 55_P1979463 | Prdx5         | 6.80983055  |
| A 51_P340699  | Rasl11a       | 6.833997879 |
| A 66_P108965  | Smpd3b        | 6.842373701 |
| A 51_P497985  | C2            | 6.861785843 |
| A 66_P119283  | LOC100417829  | 6.872215131 |
| A 55_P1994194 | Heph          | 6.872617179 |
| A 52_P298002  | Gch1          | 6.905903621 |
| A 66_P129710  | Pion          | 6.911100219 |
| A 55_P2167040 | Pvrl4         | 6.912261991 |
| A 55_P1969032 | Rgs9          | 6.917370738 |
| A 52_P609868  | Timd4         | 6.930461862 |
| A 51_P469008  | Ehd1          | 6.946804033 |
| A 51_P496720  | Dnmt3l        | 6.986282591 |
| A 55_P2048607 | Hp            | 6.98639702  |
| A 51_P400543  | Aif1          | 7.009042635 |
| A 55_P1994654 | 1810029B16Rik | 7.01392255  |
| A 51_P110301  | C3            | 7.019469976 |
| A 55_P2174541 | Dtx3l         | 7.030566541 |
| A 55_P1955906 | Stat1         | 7.043226815 |
| A 55_P2052062 | Cd200         | 7.106461443 |
| A 52_P226929  | Cflar         | 7.10727223  |
| A 55_P1988202 | Ifi203        | 7.116681643 |
| A 55_P2001233 | Pydc3         | 7.119185534 |
| A 51_P228768  | Sfn3          | 7.142145327 |
| A 52_P66520   | Clec12a       | 7.156145893 |
| A 52_P155554  | Cdc42ep2      | 7.158173241 |
| A 55_P2097448 | Rbpms         | 7.164658149 |
| A 52_P304128  | Mmp14         | 7.177142772 |

|               |               |              |
|---------------|---------------|--------------|
| A_66_P119968  | Clec4a1       | 7.179634493  |
| A_51_P235123  | Nfkбие        | 7.190013253  |
| A_52_P577384  | Il18bp        | 7.198488755  |
| A_51_P351015  | Lta           | 7.25509799   |
| A_66_P132493  | Siglece       | 7.294424197  |
| A_51_P179258  | Kif26b        | 7.315284938  |
| A_51_P169693  | Bst2          | 7.327440764  |
| A_55_P2206605 | 5830444B04Rik | 7.328082269  |
| A_55_P2173210 | LOC100504287  | 7.350316893  |
| A_52_P586944  | Bmpr1b        | 7.392282545  |
| A_55_P2082733 | Cybb          | 7.392923578  |
| A_66_P128795  | Gm1045        | 7.408441103  |
| A_52_P423247  | Pde4b         | 7.411429843  |
| A_66_P106060  | Dtx3l         | 7.443399139  |
| A_55_P2096917 | Mreg          | 7.45480492   |
| A_52_P441954  | Ovol1         | 7.456051888  |
| A_52_P650540  | Nlrp3         | 7.465182344  |
| A_51_P495581  | Tlr1          | 7.488836021  |
| A_55_P2004507 | Ifi203        | 7.492273162  |
| A_55_P1980287 | Birc3         | 7.493218393  |
| A_66_P109708  | Il1f6         | 7.498832507  |
| A_65_P01319   | Pde4b         | 7.532277751  |
| A_55_P1983162 | Pstpip2       | 7.537738992  |
| A_51_P466378  | Itgal         | 7.54049535   |
| A_55_P1963920 | A430084P05Rik | 7.555061818  |
| A_55_P2045258 | Ehd1          | 7.571557768  |
| A_55_P2142863 | Parp9         | 7.588053234  |
| A_52_P368057  | Slc7a11       | 7.598657755  |
| A_51_P222280  | Ikbke         | 7.636653334  |
| A_55_P2273439 | Nlrp3         | 7.683451858  |
| A_55_P2051885 | Bco2          | 7.716590968  |
| A_55_P2073552 | A930003A15Rik | 7.78432368   |
| A_55_P2066230 | Hck           | 7.799060593  |
| A_51_P100327  | Tap1          | 7.812885656  |
| A_55_P2006774 | Gbgt1         | 7.8131115817 |
| A_55_P2166148 | H2-M9         | 7.832176083  |
| A_51_P239750  | Inhba         | 7.884748838  |
| A_55_P2064962 | Pdpn          | 7.889933825  |
| A_55_P2023542 | Ccr7          | 7.896695716  |
| A_55_P1989663 | Slco3a1       | 7.932927148  |
| A_55_P2052834 | Lst1          | 7.959431001  |
| A_55_P1963017 | Stfa1         | 7.99512345   |
| A_51_P286488  | Ier3          | 8.084778789  |
| A_52_P409578  | Rassf4        | 8.096282925  |
| A_66_P105689  | Trim34a       | 8.105505712  |
| A_55_P1991811 | Gm5431        | 8.112782439  |
| A_55_P2347906 | B230303A05Rik | 8.136851154  |
| A_51_P401907  | Gm5483        | 8.163977464  |
| A_51_P381618  | Pla1a         | 8.167355924  |
| A_55_P2026233 | Uba7          | 8.170680845  |
| A_52_P15461   | Il15          | 8.214217795  |
| A_55_P2113256 | Parp11        | 8.223514653  |
| A_66_P122086  | 9030619P08Rik | 8.243373708  |
| A_55_P2184601 | Itgal         | 8.244338037  |
| A_66_P118906  | Adora2b       | 8.247960491  |
| A_51_P241995  | Col5a3        | 8.266387707  |
| A_55_P2026688 | Rnf213        | 8.280826106  |
| A_52_P507578  | Slamf6        | 8.304439971  |
| A_51_P333274  | Gzmb          | 8.332991451  |

|               |               |             |
|---------------|---------------|-------------|
| A 55_P1998979 | Oas1g         | 8.340352734 |
| A 66_P129976  | Apba1         | 8.345119449 |
| A 66_P116252  | Dusp16        | 8.358397671 |
| A 51_P427171  | 9030625A04Rik | 8.364489543 |
| A 55_P1993503 | Adora2b       | 8.380225701 |
| A 51_P477736  | 4932415M13Rik | 8.417977187 |
| A 55_P2073099 | Trex1         | 8.440095949 |
| A 55_P2135200 | Slfn10-ps     | 8.463085255 |
| A 55_P1998943 | Oas1a         | 8.467653648 |
| A 66_P125389  | F830016B08Rik | 8.522339237 |
| A 55_P2010152 | Sell          | 8.522503873 |
| A 55_P2012989 | Slamf7        | 8.523613641 |
| A 55_P2143282 | Nkd2          | 8.536369351 |
| A 55_P1997696 | Plbd1         | 8.584936124 |
| A 52_P799815  | Tmem171       | 8.585400974 |
| A 55_P2470474 | 9530082P21Rik | 8.58888289  |
| A 66_P128525  | Slfn5         | 8.599553529 |
| A 55_P2091191 | Slc28a2       | 8.612269704 |
| A 52_P272778  | Klrk1         | 8.649411643 |
| A 52_P487686  | BC100530      | 8.6823227   |
| A 55_P2158227 | Angpt1        | 8.689836422 |
| A 55_P2106926 | Kcna3         | 8.712719287 |
| A 55_P1973229 | LOC640746     | 8.742385525 |
| A 52_P501875  | 4930578N16Rik | 8.818216514 |
| A 51_P520306  | Alox12        | 8.853211578 |
| A 55_P2130970 | Parp10        | 8.889162742 |
| A 55_P2001334 | Gpr31c        | 8.906513735 |
| A 55_P1998942 | Oas1a         | 8.910124188 |
| A 55_P2112500 | Slco3a1       | 9.005146208 |
| A 51_P423578  | Slfn2         | 9.013862232 |
| A 55_P1982628 | 1810029B16Rik | 9.048275143 |
| A 55_P2073452 | Glp2r         | 9.052764974 |
| A 51_P105380  | 2010005H15Rik | 9.080239812 |
| A 52_P627816  | Tgm1          | 9.155172695 |
| A 51_P334104  | Dcn           | 9.212568427 |
| A 55_P2264483 | A730054J21Rik | 9.232254536 |
| A 55_P2059154 | Dtx3l         | 9.254057095 |
| A 51_P416137  | Slc31a2       | 9.302977259 |
| A 55_P1966731 | Ifi203        | 9.402969967 |
| A 55_P2059606 | Stat2         | 9.413389559 |
| A 55_P2010271 | Samsn1        | 9.442911177 |
| A 51_P389885  | Spic          | 9.509177104 |
| A 55_P2178578 | Tmprss4       | 9.556421584 |
| A 55_P1973415 | Csprs         | 9.559245152 |
| A 55_P1992889 | Serping1      | 9.565848018 |
| A 55_P2016034 | Nlrc5         | 9.592716495 |
| A 52_P332788  | C130026I21Rik | 9.687172621 |
| A 55_P1962344 | Trim21        | 9.74136066  |
| A 55_P2282421 | 4933432I03Rik | 9.770551516 |
| A 55_P2108165 | Gm6907        | 9.832969037 |
| A 55_P2064771 | Ly6c1         | 9.927796201 |
| A 55_P2117656 | Slfn8         | 9.963901986 |
| A 55_P2182467 | Slamf6        | 10.0071875  |
| A 51_P463452  | Acsl1         | 10.03304972 |
| A 52_P223809  | Dhx58         | 10.03706598 |
| A 55_P2359797 | Nod2          | 10.03990895 |
| A 51_P504815  | Stfa3         | 10.15992396 |
| A 55_P2076757 | Znfx1         | 10.22630262 |
| A 51_P214747  | Parp12        | 10.33820923 |



|               |               |             |
|---------------|---------------|-------------|
| A 51_P187262  | Mmp25         | 10.50658198 |
| A 52_P472324  | Slpi          | 10.51829821 |
| A 55_P2011797 | Sox30         | 10.63632972 |
| A 55_P1971951 | Cd86          | 10.6949677  |
| A 51_P398766  | Gbp1          | 10.75100259 |
| A 55_P2147083 | Tnfaip6       | 10.86470728 |
| A 51_P114616  | Batf          | 10.90066466 |
| A 51_P327996  | Ccl22         | 10.93946288 |
| A 55_P2019601 | Csprs         | 11.06648843 |
| A 55_P1965000 | Ddx58         | 11.12354659 |
| A 51_P514712  | Parp14        | 11.26411138 |
| A 55_P2054491 | Slc31a2       | 11.44724173 |
| A 66_P135106  | Slco3a1       | 11.48333431 |
| A 55_P2100103 | Htr7          | 11.55867162 |
| A 51_P443403  | Smoc1         | 11.59965909 |
| A 52_P632601  | Zfp811        | 11.63761243 |
| A 55_P2110086 | Rasgrp1       | 11.64157089 |
| A 55_P2133195 | Gm4951        | 11.71556235 |
| A 52_P266132  | Fgl2          | 11.74006507 |
| A 51_P376238  | Serp1ng1      | 11.81734388 |
| A 55_P2042988 | Aoah          | 11.82449561 |
| A 55_P1998843 | Ifi203        | 11.88388818 |
| A 55_P1978987 | Ifih1         | 11.88772465 |
| A 51_P496432  | Acs1          | 11.97700264 |
| A 52_P99888   | Cxcl16        | 11.98860649 |
| A 52_P613241  | Icam1         | 12.10003068 |
| A 52_P385536  | Ddx58         | 12.13179122 |
| A 51_P265495  | Ly6a          | 12.21471782 |
| A 51_P193146  | Ms4a6c        | 12.23782034 |
| A 51_P488739  | Niacr1        | 12.25937504 |
| A 51_P517695  | Ly6f          | 12.4726784  |
| A 55_P2082961 | Fnbp1l        | 12.47860252 |
| A 55_P1978521 | Gbp10         | 12.5024766  |
| A 55_P2129354 | Pilra         | 12.59837714 |
| A 55_P2181222 | Pydc3         | 12.60539429 |
| A 52_P216613  | Gpr18         | 12.60609644 |
| A 55_P1990032 | Cxcl5         | 12.69332618 |
| A 51_P315391  | Txlnb         | 12.78938778 |
| A 55_P2064004 | Rapgef2       | 12.82242298 |
| A 55_P2088401 | H2-T9         | 12.9531077  |
| A 55_P2005783 | Ifih1         | 12.95866235 |
| A 55_P1959953 | BC006779      | 13.14244835 |
| A 51_P508259  | Ppm1n         | 13.23899314 |
| A 52_P56488   | Zfp558        | 13.26828959 |
| A 52_P466147  | Rarres2       | 13.3058097  |
| A 51_P159503  | Rnf213        | 13.34679555 |
| A 66_P105046  | Il18          | 13.44252827 |
| A 55_P2086279 | Gm7609        | 13.46594246 |
| A 51_P209183  | Cxcl14        | 13.46632721 |
| A 55_P2082180 | Tnfrsf9       | 13.5755797  |
| A 55_P2137049 | AA467197      | 13.66321794 |
| A 51_P202633  | Ebi3          | 13.78483697 |
| A 51_P324473  | 9130014G24Rik | 13.82577359 |
| A 51_P275454  | Trim30a       | 13.93947866 |
| A 51_P478722  | Tgtp1         | 14.06194839 |
| A 55_P2098971 | Gm14085       | 14.10039233 |
| A 51_P286357  | Emr4          | 14.22598655 |
| A 65_P17218   | Mndal         | 14.32082211 |
| A 55_P2004867 | Serpinb2      | 14.39070374 |

|               |               |             |
|---------------|---------------|-------------|
| A 55_P1981479 | Irgm1         | 14.4458491  |
| A 55_P2062246 | Tgtp2         | 14.45939015 |
| A 51_P262171  | Irgm1         | 14.54076533 |
| A 51_P172573  | Sod2          | 14.60170264 |
| A 51_P464918  | Mefv          | 14.67782809 |
| A 55_P2035018 | Clec4n        | 14.72650015 |
| A 55_P2129360 | Ntng2         | 14.75995277 |
| A 66_P116173  | Il23r         | 14.84503408 |
| A 55_P2048759 | 4930583H14Rik | 14.92833085 |
| A 55_P1982896 | Lpcat2        | 14.98069758 |
| A 66_P105585  | Slfn8         | 15.00959454 |
| A 55_P2107775 | Apol9a        | 15.03418649 |
| A 52_P199633  | Trim30d       | 15.0850461  |
| A 55_P2149083 | Fpr-rs6       | 15.08730166 |
| A 51_P254656  | Hdc           | 15.19564491 |
| A 55_P2001336 | Gpr31c        | 15.2207815  |
| A 51_P166728  | Pou2f2        | 15.29289569 |
| A 55_P2087628 | LOC640793     | 15.46191385 |
| A 55_P2042813 | Gbp11         | 15.71241789 |
| A 55_P2016099 | Gpr31c        | 15.87484763 |
| A 51_P405912  | Lmcd1         | 15.95357339 |
| A 52_P64514   | Herc6         | 16.0188303  |
| A 55_P2101585 | Cd55          | 16.02101115 |
| A 55_P2019719 | Oas2          | 16.03173321 |
| A 55_P2055587 | Enpp4         | 16.31914378 |
| A 55_P2192961 | Trim30b       | 16.65971979 |
| A 66_P133148  | Aoah          | 16.86020882 |
| A 55_P2011084 | LOC100046632  | 16.95279683 |
| A 51_P382152  | Procr         | 17.07601962 |
| A 52_P68893   | Ifng          | 17.28027174 |
| A 52_P483799  | Pydc4         | 17.322174   |
| A 55_P1970763 | Pilrb2        | 17.83898344 |
| A 51_P108020  | Zmynd15       | 17.86379258 |
| A 51_P233334  | Stc1          | 17.88641934 |
| A 51_P428372  | Ppbb          | 17.88721531 |
| A 66_P128761  | Pydc3         | 17.89300261 |
| A 51_P343833  | Traf1         | 18.30754466 |
| A 55_P1991812 | Gm5431        | 18.34464232 |
| A 51_P327657  | H28           | 18.52788887 |
| A 51_P213359  | Has2          | 18.90553538 |
| A 66_P112006  | H2-T10        | 19.09255666 |
| A 55_P1983668 | Gm6377        | 19.36273844 |
| A 55_P2183147 | Tdgf1         | 19.62194842 |
| A 51_P430766  | Il10          | 19.6834659  |
| A 55_P1966833 | Xaf1          | 20.64536715 |
| A 52_P386627  | Irak3         | 20.91125944 |
| A 55_P2018806 | Trim30e-ps1   | 21.07910051 |
| A 51_P452629  | Tlr2          | 21.39305924 |
| A 55_P2004562 | Klra2         | 22.02537428 |
| A 55_P2141943 | Ube2l6        | 22.08104278 |
| A 55_P2039359 | Tnfsf11       | 22.27620239 |
| A 52_P679860  | Herc6         | 22.99864883 |
| A 51_P255699  | Mmp3          | 23.10908448 |
| A 55_P2111302 | Cp            | 23.23418606 |
| A 51_P246066  | Slamf9        | 23.95957645 |
| A 55_P2129348 | Pilra         | 24.26356107 |
| A 52_P380369  | D14Ertd668e   | 24.564034   |
| A 55_P2026632 | Pilrb1        | 24.69005252 |
| A 52_P211956  | Ms4a4d        | 25.57998033 |

|               |              |             |
|---------------|--------------|-------------|
| A 51_P304170  | Rtp4         | 26.01355382 |
| A 55_P1974178 | Pyhin1       | 26.08629229 |
| A 51_P144180  | Ifnb1        | 26.93523225 |
| A 51_P265374  | Vnn3         | 27.4483648  |
| A 55_P2090617 | Pilra        | 27.51324308 |
| A 55_P1978465 | H2-Q8        | 27.54844153 |
| A 51_P509573  | Ccl4         | 27.86152846 |
| A 55_P2137611 | Irgm2        | 28.00909181 |
| A 51_P387123  | Oasl2        | 28.09290867 |
| A 51_P487690  | Ifi44        | 28.42850643 |
| A 55_P1969650 | Rasgrp1      | 28.52035986 |
| A 55_P1974189 | Ptges        | 28.62890176 |
| A 51_P257550  | Marcksl1     | 28.652591   |
| A 55_P2169247 | Gm15056      | 28.71655937 |
| A 55_P2038262 | Gm4902       | 28.82752353 |
| A 55_P2008740 | Fcgr1        | 28.97969488 |
| A 51_P254855  | Ptgs2        | 29.12271795 |
| A 51_P172853  | Cd14         | 29.22729484 |
| A 51_P472867  | Oas3         | 29.76695719 |
| A 55_P2073024 | Gm4841       | 30.51235227 |
| A 51_P420547  | Clic5        | 30.64117996 |
| A 66_P110633  | Apol9b       | 30.71669307 |
| A 51_P514085  | Mx2          | 31.06717381 |
| A 51_P385099  | Tnf          | 31.08437572 |
| A 55_P1988975 | Ms4a4b       | 31.69342346 |
| A 51_P492047  | Fam3b        | 31.82471744 |
| A 55_P2097219 | Gbp1         | 32.61711962 |
| A 51_P100852  | Fam26f       | 32.63475945 |
| A 51_P499838  | Bst1         | 32.65468531 |
| A 55_P2115401 | Bst1         | 32.89965157 |
| A 66_P101942  | Gm9706       | 32.8998486  |
| A 55_P2088033 | Gm6904       | 33.41809755 |
| A 51_P474459  | Socs3        | 33.534061   |
| A 51_P203955  | Gbp2         | 35.22554201 |
| A 51_P463846  | Gbp7         | 36.29035941 |
| A 55_P2015687 | D14Erttd668e | 37.15650086 |
| A 51_P288138  | Fpr2         | 37.27049048 |
| A 51_P112355  | Igtp         | 37.67714648 |
| A 52_P203691  | Arl5c        | 37.83124368 |
| A 55_P1962918 | Mnda         | 38.31130144 |
| A 55_P1997756 | Il6          | 38.40597579 |
| A 55_P1977038 | Cxcl9        | 38.43054684 |
| A 55_P1994862 | Ddx60        | 39.62792386 |
| A 55_P2098398 | Trim30c      | 40.59427855 |
| A 51_P262515  | Phf11        | 40.86506347 |
| A 55_P2173892 | Isg20        | 41.05001659 |
| A 66_P139683  | Zbp1         | 42.1716832  |
| A 55_P2067518 | Slc13a3      | 44.06144793 |
| A 51_P140710  | Ccl3         | 45.2371677  |
| A 52_P203440  | U90926       | 46.63009294 |
| A 55_P1962400 | Il1rn        | 47.43536851 |
| A 66_P101835  | Cd38         | 47.85684851 |
| A 55_P2018017 | Tnfsf10      | 52.53007357 |
| A 55_P2114953 | Usp18        | 56.78451662 |
| A 55_P2044932 | Gpr84        | 59.54424615 |
| A 55_P2103698 | Isg15        | 61.77374668 |
| A 55_P2181963 | Gm8369       | 62.60454095 |
| A 66_P112573  | Isg20        | 68.6538347  |
| A 55_P2052385 | Gbp6         | 75.51901277 |

|               |               |             |
|---------------|---------------|-------------|
| A_55_P2052380 | Gbp6          | 75.63008315 |
| A_55_P2036627 | Pydc3         | 77.33666355 |
| A_55_P2135064 | H2-M2         | 80.13855549 |
| A_51_P432229  | Gstt4         | 80.17787076 |
| A_55_P2036357 | Pyhin1        | 82.69900921 |
| A_55_P2118441 | Mx1           | 85.61088887 |
| A_52_P670026  | Rsad2         | 86.6898451  |
| A_51_P421876  | Irf7          | 87.16429007 |
| A_55_P2103837 | Gbp4          | 88.9894312  |
| A_66_P128537  | Isg15         | 100.7568769 |
| A_55_P2035509 | Pyhin1        | 101.7873383 |
| A_55_P2472435 | Gbp3          | 101.9376083 |
| A_55_P2082319 | BC094916      | 104.4920085 |
| A_51_P371750  | Marco         | 121.7635318 |
| A_52_P1020860 | AW112010      | 124.5708844 |
| A_51_P217463  | Cxcl2         | 127.7905284 |
| A_55_P2180176 | Ms4a6b        | 129.2112969 |
| A_51_P312485  | Fpr1          | 138.1310649 |
| A_52_P638459  | Ccl5          | 150.3835205 |
| A_52_P100926  | Il1a          | 151.7994023 |
| A_55_P1972872 | I830012O16Rik | 162.5778495 |
| A_52_P161488  | Clec4e        | 164.8426327 |
| A_51_P500082  | Gm14446       | 173.2199156 |
| A_51_P161021  | Ifit2         | 182.4862053 |
| A_51_P183812  | Slfn4         | 183.8237673 |
| A_55_P1990633 | Iigp1         | 187.0503688 |
| A_55_P2086433 | Oasl1         | 187.3353565 |
| A_55_P2158404 | Cmpk2         | 189.363255  |
| A_55_P2135986 | Ms4a4c        | 194.409108  |
| A_52_P186937  | Cmpk2         | 195.6308929 |
| A_51_P136294  | Ms4a4b        | 235.0260888 |
| A_55_P2016459 | Cxcl10        | 242.3157719 |
| A_51_P212782  | Il1b          | 266.1898037 |
| A_51_P123625  | Irg1          | 312.4512063 |
| A_51_P413866  | Cfb           | 339.1411182 |
| A_51_P359570  | Ifit3         | 341.6351955 |
| A_52_P232813  | Cxcl3         | 367.2186702 |
| A_52_P425890  | Slfn1         | 433.7225971 |
| A_66_P106388  | Ms4a4c        | 506.7490609 |
| A_51_P327751  | Ifit1         | 517.1138015 |
| A_51_P181286  | Cd69          | 619.7589112 |
| A_66_P117933  | I830012O16Rik | 821.2860596 |
| A_51_P461665  | Cxcl9         | 916.3510601 |
| A_55_P1953169 | Saa3          | 994.1424644 |
| A_55_P2016462 | Cxcl10        | 1412.42329  |
